# Supplementary material for: Levels and sources of PBDEs and PCBs in human nails from e-waste, urban, and rural areas in South China
Source: Royal Society of Chemistry journal article supplement (doi:10.1039/d0em00221f), 2020-01-01
Supplement: d0em00221f1.pdf [file d0em00221f1.pdf]

## Supplementary Information

### Levels and sources of PBDEs and PCBs in human nails from e-waste, urban, and rural areas in South China

Hua-Jun Meng <sup>a, b</sup>, Bin Tang <sup>a</sup>, Jing Zheng <sup>a, b \*</sup>, She-Xia Ma <sup>a</sup>, Feng-Shan Cai <sup>a</sup>, Xi  
Zhuang <sup>a</sup>, Jun-Li Wang <sup>b</sup>, Yun-Jiang Yu <sup>a\*</sup>

<sup>a</sup> *State Environmental Protection Key Laboratory of Environmental Pollution Health Risk  
Assessment, South China Institute of Environmental Sciences, Ministry of Ecology and  
Environment, Guangzhou, 510655, P.R. China*

<sup>b</sup> *School of Public Health, Key Laboratory of Environmental Pollution and Disease Monitoring of  
Ministry of Education, Guizhou Medical University, Guiyang, 550000, P.R. China*

*\* Corresponding authors*

*E-mail addresses: [zhengjing@scies.org](mailto:zhengjing@scies.org) (J. Zheng); [yuyunjiang@scies.org](mailto:yuyunjiang@scies.org) (Y. Yu)*

**Table S1** General information of the participants in the present study

| NO. | E-waste area |        | Urban area |        | Rural area |        |
|-----|--------------|--------|------------|--------|------------|--------|
|     | Age          | Gender | Age        | Gender | Age        | Gender |
| 1   | 50           | male   | 43         | female | 24         | female |
| 2   | 50           | male   | 30         | female | 39         | female |
| 3   | 51           | female | 35         | female | 27         | female |
| 4   | 29           | female | 56         | female | 47         | male   |
| 5   | 32           | male   | 25         | male   | 53         | female |
| 6   | 45           | female | 45         | female | 21         | male   |
| 7   | 48           | male   | 25         | male   | 23         | female |
| 8   | 39           | female | 30         | female | 47         | female |
| 9   | 48           | male   | 52         | female | 22         | male   |
| 10  | 65           | female | 28         | male   | 48         | female |
| 11  | 60           | male   | 53         | male   | 55         | male   |
| 12  | 54           | male   | 54         | male   | 50         | female |
| 13  | 57           | female | 48         | male   | 22         | male   |
| 14  | 48           | male   | 31         | female | 21         | female |
| 15  | 35           | female | 21         | male   | 21         | female |
| 16  | 34           | male   | 21         | female | 24         | male   |
| 17  | 35           | female | 24         | male   | 23         | female |
| 18  | 43           | male   | 23         | female | 42         | female |
| 19  | 32           | female | 23         | female | 22         | male   |
| 20  | 40           | female | 25         | male   | 22         | male   |
| 21  | 40           | male   | 26         | female | 24         | female |
| 22  | 49           | male   | 25         | female | 37         | female |
| 23  | 49           | male   | 24         | female | 44         | male   |
| 24  | 60           | female | 24         | male   | 26         | female |
| 25  | 42           | male   | 26         | male   | 27         | female |
| 26  | 43           | male   | 26         | female | 31         | male   |
| 27  | 42           | female | 24         | female | 28         | male   |
| 28  | 51           | female | 24         | female | 26         | male   |
| 29  | 54           | female | 23         | male   | 33         | female |
| 30  | 43           | female | 26         | male   | 26         | female |
| 31  |              |        | 25         | male   | 32         | male   |
| 32  |              |        |            |        | 28         | female |
| 33  |              |        |            |        | 26         | male   |

**Table S2** Summary of PBDE and PCB concentrations in nail samples of separated male and female participants (ng/g dw)

|                      | E-waste recycling area |                  | Rural area        |                  | Urban area       |                  |
|----------------------|------------------------|------------------|-------------------|------------------|------------------|------------------|
|                      | male (n = 15)          | female (n = 15)  | male (n = 14)     | female (n = 19)  | male (n = 14)    | female (n = 17)  |
| BDE 28               | nd (nd-0.66)           | nd (nd-0.89)     | nd (nd-0.78)      | nd (nd-0.37)     | nd (nd-0.29)     | nd (nd-0.52)     |
| BDE 47               | 0.08(nd-2.70)          | 0.58 (nd-3.18)   | nd (nd-1.22)      | nd (nd-5.60)     | nd (nd-0.42)     | nd (nd-0.48)     |
| BDE 99               | nd (nd-0.65)           | nd (nd-6.53)     | 0.14 (nd-0.98)    | 0.26 (nd-1.32)   | nd               | nd (nd-0.21)     |
| BDE 100              | nd (nd-0.16)           | nd               | nd (nd-0.37)      | nd (nd-2.89)     | nd               | nd               |
| BDE 153              | 3.12 (nd-17.3)         | 3.83 (1.19-7.58) | 0.03(nd-2.50)     | 0.07 (nd-6.13)   | 1.08 (0.62-3.32) | 1.11 (0.54-2.02) |
| BDE 154              | 0.69 (0.65-2.31)       | 0.95 (0.32-1.61) | 0.17 (0.07-0.13)  | 0.25 (nd-1.11)   | 0.23 (0.16-0.67) | nd (0.11-0.96)   |
| BDE 183              | 3.00 (0.85-64.8)       | 3.25 (0.54-11.2) | 0.27 (nd-88.8)    | 0.47 (nd-20.9)   | 0.85 (0.21-2.79) | 0.48 (0.19-2.20) |
| BDE 209              | 381 (220-1270)         | 393 (164-1200)   | 57.9 (14.6-482)   | 99.1 (nd-670)    | 133 (65.24-425)  | 113 (65.9-239)   |
| ∑ <sub>8</sub> PBDEs | 411 (224-1280)         | 404 (168-1210)   | 71.4 (14.9-487)   | 104 (3.54-679)   | 135 (67.4-429)   | 114 (67.2-244)   |
| PCB8                 | 2.14 (0.83-4.68)       | 2.00 (0.85-5.93) | 0.59 (0.19-3.48)  | 0.81 (0.10-3.93) | 0.47 (nd-0.90)   | 0.64 (nd-1.44)   |
| PCB18                | 0.19 (nd-4.93)         | 0.56 (nd-12.9)   | nd (nd-0.80)      | nd (nd-0.88)     | nd               | nd (nd-2.90)     |
| PCB28                | 5.12 (0.30-18.6)       | 2.84 (0.23-16.4) | 0.33 (nd-4.33)    | nd (nd-5.45)     | 0.04 (nd-0.29)   | nd (nd-0.16)     |
| PCB52                | 11.6 (6.5-23.1)        | 14.1 (5.7-32.6)  | 3.13 (1.03-20.4)  | 5.50 (0.46-35.7) | 1.60 (0.82-3.22) | 1.83 (1.00-4.82) |
| PCB44                | 5.69 (nd-12.8)         | 5.41 (nd-22.2)   | 0.52 (0.20-3.74)  | 1.32 (0.18-6.00) | 0.56 (nd-1.83)   | 0.67 (nd-1.51)   |
| PCB66                | 3.88 (0.76-10.8)       | 3.01 (1.64-7.85) | 1.85 (0.29-3.48)  | 1.05 (0.22-5.99) | 0.40 (nd-1.50)   | 0.28 (nd-1.03)   |
| PCB101               | 5.54 (1.77-13.9)       | 4.72 (nd-16.9)   | 0.21 (nd-2.98)    | 0.55 (0.02-3.16) | 0.31 (nd-0.92)   | 0.31 (nd-1.10)   |
| PCB77                | 5.39 (0.81-16.5)       | 4.70 (1.21-31.2) | 2.97 (0.74-18.8)  | 5.39 (0.46-29.3) | 0.86 (nd-2.89)   | 0.59 (nd-9.44)   |
| PCB118               | 7.34 (2.64-36.2)       | 5.89 (1.80-39.5) | 0.28 (0.061-23.1) | 0.35 (0.03-20.1) | 0.14 (nd-1.00)   | 0.16 (nd-1.62)   |
| PCB153               | 6.33 (nd-33.1)         | 6.04 (nd-16.6)   | 0.30 (nd-2.13)    | 0.42 (nd-11.0)   | nd (nd-0.31)     | 0.07 (nd-0.64)   |
| PCB105               | 7.17 (0.79-132)        | 9.37 (1.31-221)  | 0.30 (nd-18.8)    | 0.98 (0.10-24.2) | 0.35 (0.078-3.6) | 0.48 (0.08-0.87) |
| PCB138               | 10.0 (2.76-38.1)       | 7.33 (nd-32.0)   | 0.89 (nd-9.49)    | 0.93 (nd-5.37)   | nd (nd-2.37)     | 1.12 (nd-1.89)   |
| PCB126               | 1.44 (nd-3.72)         | 0.57 (nd-10.5)   | nd (nd-0.30)      | 0.06 (nd-3.10)   | nd (nd-0.67)     | nd (nd-0.47)     |
| PCB187               | 5.11 (nd-10.1)         | 3.1 (nd-10.4)    | nd (nd-1.01)      | nd (nd-2.90)     | nd (nd-1.43)     | nd (nd-1.60)     |

|                    |                  |                  |                  |                 |                  |                  |
|--------------------|------------------|------------------|------------------|-----------------|------------------|------------------|
| PCB128             | 2.62 (0.79-8.70) | 3.30 (nd-10.0)   | 0.04 (nd-0.95)   | 0.15 (nd-5.23)  | nd (nd-0.20)     | 0.07 (nd-3.54)   |
| PCB180             | 4.64 (nd-26.7)   | 2.71 (nd-13.2)   | 0.56 (nd-8.65)   | 1.01 (nd-7.71)  | nd (nd-2.22)     | nd (nd-3.13)     |
| PCB170             | 2.73 (nd-14.8)   | 1.33 (nd-9.60)   | 0.45 (nd-4.90)   | 0.66 (nd-5.77)  | nd (nd-1.00)     | nd (nd-1.20)     |
| PCB195             | 0.32 (nd-12.8)   | nd (nd-20.0)     | nd (nd-1.61)     | nd (nd-16.8)    | nd               | nd (nd-1.02)     |
| PCB206             | 1.83 (nd-24.5)   | 0.99 (nd-14.9)   | nd (nd-0.67)     | 0.31 (nd-10.6)  | nd (nd-2.18)     | nd (nd-2.69)     |
| PCB209             | 2.12 (nd-11.1)   | 3.29 (1.53-22.7) | 0.40 (nd-3.39)   | 1.10 (nd-4.88)  | 0.08 (nd-1.56)   | 0.45 (nd-1.89)   |
| $\Sigma_{20}$ PCBs | 102 (72.0-224)   | 101 (58.7-341)   | 16.0 (10.5-87.1) | 25.9 (2.90-145) | 7.24 (4.30-15.3) | 9.00 (5.30-18.1) |

---

**Table S3** Congener-specific concentrations in hair (ng/g, dw) of e-waste recycling workers, and the corresponding indoor dust (ng/g, dw) from South China

| NO.        | Dust   |        |        |         |         |         |         |         |        |       |       |        |        |        |        |        |       |
|------------|--------|--------|--------|---------|---------|---------|---------|---------|--------|-------|-------|--------|--------|--------|--------|--------|-------|
|            | BDE 28 | BDE 47 | BDE 99 | BDE 100 | BDE 154 | BDE 153 | BDE 183 | BDE 209 | Total  | CB 28 | CB 52 | CB 101 | CB 118 | CB 138 | CB 153 | CB 180 | Total |
| 1          | 3.24   | 45.9   | 11.6   | 84.0    | 10.9    | 21.4    | 43.7    | 8530    | 8750   | 154   | 65.9  | 50.4   | 65.0   | 88.5   | 94.4   | 49.5   | 568   |
| 2          | 3.57   | 96.5   | 31.1   | 220     | 30.8    | 68.5    | 142     | 17100   | 17700  | 596   | 193   | 139    | 203    | 264    | 263    | 132    | 1790  |
| 3          | 3.87   | 56.4   | 12.6   | 82.3    | 13.9    | 25.8    | 62.1    | 10700   | 10900  | 505   | 217   | 196    | 269    | 292    | 305    | 117    | 1900  |
| 4          | 6.33   | 271    | 77.7   | 483     | 64.5    | 219     | 1140    | 10900   | 13200  | 962   | 333   | 412    | 610    | 652    | 643    | 185    | 3800  |
| 5          | 3.72   | 91.4   | 26.6   | 168     | 17.7    | 30.7    | 76.7    | 10800   | 11200  | 479   | 218   | 198    | 279    | 319    | 329    | 111    | 1930  |
| 6          | 4.80   | 111    | 28.9   | 169     | 18.7    | 42.7    | 144     | 44100   | 44600  | 1400  | 477   | 278    | 338    | 337    | 345    | 115    | 3290  |
| 7          | 3.00   | 79.8   | 22.5   | 168     | 21.7    | 45.7    | 143     | 49200   | 49700  | 1530  | 572   | 349    | 419    | 407    | 421    | 110    | 3800  |
| 8          | 8.19   | 142    | 37.3   | 248     | 26.1    | 59.1    | 157     | 10400   | 11100  | 1930  | 607   | 447    | 630    | 607    | 590    | 215    | 5030  |
| 9          | 3.27   | 46.0   | 12.8   | 72.7    | 12.4    | 27.9    | 84.4    | 9840    | 10100  | 1690  | 724   | 360    | 297    | 268    | 295    | 90.5   | 3720  |
| 10         | 8.22   | 296    | 82.0   | 521     | 50.4    | 73.6    | 135     | 15100   | 16300  | 604   | 302   | 203    | 254    | 309    | 336    | 173    | 2180  |
| 11         | 3.12   | 88.9   | 27.6   | 153     | 16.9    | 26.8    | 38.0    | 9550    | 9910   | 194   | 103   | 73.2   | 104    | 139    | 142    | 72.6   | 828   |
| 12         | 7.47   | 152    | 36.3   | 215     | 34.6    | 61.3    | 427     | 35900   | 36800  | 348   | 281   | 302    | 334    | 418    | 470    | 206    | 2360  |
| 13         | 13.2   | 211    | 46.3   | 388     | 72.1    | 231     | 606     | 57700   | 59200  | 778   | 744   | 970    | 1089   | 1170   | 1210   | 317    | 6270  |
| 14         | 14.6   | 235    | 50.7   | 365     | 51.3    | 117     | 215     | 30100   | 31200  | 1340  | 774   | 751    | 992    | 1010   | 1050   | 291    | 6210  |
| 15         | 5.22   | 79.9   | 18.8   | 162     | 25.6    | 75.1    | 110     | 32100   | 32600  | 326   | 211   | 152    | 169    | 174    | 183    | 74.6   | 1290  |
| 16         | 13.8   | 251    | 64.8   | 448     | 45.7    | 123     | 613     | 43400   | 45000  | 1660  | 1260  | 1480   | 1990   | 2110   | 2150   | 573    | 11200 |
| 17         | 9.15   | 181    | 49.4   | 360     | 52.1    | 110     | 251     | 152000  | 153000 | 680   | 518   | 615    | 718    | 740    | 791    | 227    | 4288  |
| 18         | 38.3   | 600    | 151    | 1071    | 122     | 405     | 1370    | 74900   | 78700  | 3950  | 2770  | 1330   | 1360   | 899    | 951    | 255    | 11500 |
| 19         | 14.3   | 182    | 43.8   | 292     | 44.0    | 79.0    | 136     | 17500   | 18300  | 807   | 794   | 566    | 446    | 389    | 441    | 115    | 3560  |
| Mean       | 8.81   | 169    | 43.8   | 298     | 38.5    | 96.9    | 310     | 33700   | 34700  | 1050  | 588   | 467    | 556    | 557    | 580    | 180    | 3980  |
| Human hair |        |        |        |         |         |         |         |         |        |       |       |        |        |        |        |        |       |
| 1          | 3.82   | 111    | 4.38   | 4.71    | 3.33    | 30.2    | 43.8    | 295     | 497    | 247   | 110   | 130    | 87.5   | 20.4   | 29.4   | 2.22   | 625   |

---

|    |      |      |      |      |      |      |       |      |      |      |      |      |      |      |       |      |      |
|----|------|------|------|------|------|------|-------|------|------|------|------|------|------|------|-------|------|------|
| 2  | 0.88 | 52.4 | 0.84 | 1.00 | 0.40 | 5.08 | 2.94  | 29.5 | 93   | 75.5 | 32.7 | 38.2 | 30.2 | 13.7 | 15.9  | 3.97 | 210  |
| 3  | 1.56 | 64.7 | 1.90 | 1.90 | 1.73 | 39.5 | 13.9  | 65.2 | 190  | 207  | 8.8  | 82.8 | 48.4 | 13.5 | 18.6  | 2.46 | 381  |
| 4  | 2.08 | 98.3 | 4.29 | 3.02 | 9.65 | 26.6 | 23.8  | 44.2 | 212  | 300  | 168  | 147  | 119  | 49.0 | 58.4  | 11.6 | 853  |
| 5  | 5.78 | 105  | 4.77 | 2.53 | 3.60 | 34.7 | 15.5  | 118  | 289  | 290  | 146  | 184  | 127  | 39.9 | 55.2  | 6.58 | 848  |
| 6  | 2.17 | 72.9 | 2.60 | 2.42 | 2.60 | 22.3 | 8.93  | 52.7 | 167  | 108  | 45.9 | 41.4 | 29.9 | 15.9 | 19.5  | 7.18 | 268  |
| 7  | 3.13 | 76.6 | 5.70 | 5.88 | 4.02 | 28.3 | 52.0  | 444  | 620  | 191  | 72.1 | 86.2 | 85.5 | 30.8 | 35.9  | 5.87 | 507  |
| 8  | 3.63 | 23.8 | 8.88 | 10.4 | 14.1 | 82.1 | 161.6 | 742  | 1046 | 223  | 108  | 84.5 | 64.0 | 23.8 | 28.7  | 5.09 | 537  |
| 9  | 1.63 | 56.7 | 3.10 | 1.70 | 3.52 | 45.0 | 37.8  | 736  | 885  | 129  | 60.4 | 50.7 | 36.5 | 12.9 | 15.5  | 3.49 | 308  |
| 10 | 5.23 | 146  | 19.0 | 22.0 | 5.99 | 47.5 | 54.2  | 111  | 411  | 217  | 110  | 97.7 | 86.5 | 34.5 | 39.5  | 7.72 | 593  |
| 11 | 3.08 | 58.2 | 8.00 | 5.85 | 7.80 | 38.4 | 87.1  | 586  | 794  | 239  | 108  | 274  | 349  | 125  | 146   | 14.3 | 1260 |
| 12 | 2.10 | 68.2 | 6.32 | 3.33 | 0.40 | 37.2 | 35.9  | 582  | 735  | 159  | 76.2 | 115  | 125  | 39.6 | 46.1  | 11.3 | 572  |
| 13 | 2.24 | 68.7 | 4.02 | 4.02 | 3.61 | 63.2 | 42.3  | 122  | 310  | 128  | 49.9 | 73.2 | 96.1 | 29.7 | 30.9  | 6.72 | 414  |
| 14 | 2.53 | 69.3 | 4.04 | 2.41 | 2.53 | 31.4 | 13.8  | 159  | 285  | 32.4 | 18.0 | 16.9 | 14.1 | 8.23 | 10.6  | 2.17 | 102  |
| 15 | 1.83 | 87.1 | 3.53 | 5.94 | 0.40 | 9.66 | 10.2  | 641  | 760  | 45.3 | 28.3 | 22.2 | 12.8 | 5.58 | 8.70  | 1.88 | 125  |
| 16 | 0.50 | 13.5 | 0.93 | 1.00 | 0.98 | 13.5 | 9.21  | 9.17 | 48.7 | 33.8 | 15.9 | 19.0 | 15.6 | 7.95 | 9.83  | 3.06 | 105  |
| 17 | 3.83 | 78.6 | 3.03 | 1.73 | 3.03 | 16.7 | 5.26  | 38.8 | 151  | 39.3 | 23.6 | 38.8 | 33.5 | 12.1 | 16.2  | 3.66 | 167  |
| 18 | 0.98 | 77.1 | 1.47 | 1.58 | 1.80 | 28.9 | 5.51  | 76.8 | 194  | 70.9 | 33.6 | 45.4 | 46.0 | 20.4 | 25.0  | 6.72 | 248  |
| 19 | 2.04 | 129  | 0.40 | 1.00 | 19.0 | 15.7 | 51.5  | 256  | 475  | 54.9 | 28.5 | 38.3 | 35.7 | 20.5 | 28.1  | 12.3 | 218  |
| 20 | 7.50 | 74.1 | 3.39 | 3.39 | 2.70 | 18.5 | 50.4  | 2720 | 2880 | 407  | 215  | 248  | 262  | 110  | 136   | 28.1 | 1410 |
| 21 | 2.14 | 90.8 | 2.87 | 1.20 | 0.40 | 16.0 | 8.81  | 3.83 | 126  | 390  | 214  | 181  | 143  | 57.1 | 80.3  | 13.4 | 1080 |
| 22 | 2.46 | 94.9 | 3.92 | 1.40 | 3.93 | 9.45 | 8.59  | 20.3 | 145  | 146  | 57   | 239  | 174  | 34.2 | 35.3  | 7.67 | 694  |
| 23 | 2.79 | 69.1 | 6.13 | 5.18 | 2.44 | 12.6 | 17.0  | 67.0 | 182  | 350  | 217  | 217  | 168  | 81.2 | 98.7  | 15.4 | 1150 |
| 24 | 3.90 | 76.7 | 5.47 | 6.10 | 4.15 | 21.2 | 46.9  | 702  | 866  | 346  | 287  | 333  | 236  | 77.7 | 104.0 | 16.8 | 1400 |
| 25 | 2.41 | 73.6 | 4.22 | 4.34 | 3.98 | 55.2 | 47.9  | 142  | 334  | 406  | 288  | 317  | 242  | 95.7 | 126.8 | 16.8 | 1490 |
| 26 | 3.02 | 148  | 8.77 | 3.48 | 17.6 | 38.0 | 39.5  | 109  | 367  | 253  | 135  | 163  | 153  | 66.2 | 82.2  | 14.0 | 866  |
| 27 | 3.28 | 89.4 | 13.3 | 14.8 | 13.8 | 70.3 | 72.0  | 535  | 812  | 388  | 192  | 278  | 283  | 111  | 135   | 20.6 | 1410 |

|      |      |      |      |      |      |      |      |     |     |      |      |      |      |      |      |      |      |
|------|------|------|------|------|------|------|------|-----|-----|------|------|------|------|------|------|------|------|
| 28   | 2.35 | 51.9 | 3.64 | 1.69 | 3.51 | 42.1 | 32.6 | 427 | 565 | 276  | 139  | 251  | 271  | 102  | 127  | 23.5 | 1190 |
| 29   | 2.82 | 80.3 | 5.93 | 2.53 | 2.89 | 23.5 | 17.3 | 297 | 433 | 72.1 | 36.4 | 42.5 | 37.4 | 15.3 | 19.6 | 4.86 | 228  |
| 30   | 2.27 | 71.0 | 0.40 | 7.25 | 0.40 | 11.1 | 7.81 | 429 | 529 | 129  | 73.9 | 65.5 | 42.2 | 18.5 | 15.4 | 6.72 | 351  |
| 31   | 1.23 | 78.2 | 6.47 | 5.16 | 4.9  | 36.2 | 49.1 | 440 | 622 | 82.4 | 39.8 | 30.8 | 26.1 | 12.0 | 14.9 | 5.42 | 212  |
| 32   | 1.47 | 33.2 | 1.40 | 3.14 | 0.40 | 6.69 | 8.37 | 474 | 528 | 127  | 66.4 | 103  | 110  | 61.3 | 72.4 | 15.8 | 556  |
| Mean | 2.71 | 77.7 | 4.78 | 4.44 | 4.68 | 30.5 | 33.8 | 359 | 517 | 193  | 100  | 127  | 112  | 42.7 | 52.7 | 9.61 | 636  |

\* Hair data was from the (Zheng et al., 2016) . Dust data was from the (He et al., 2017).

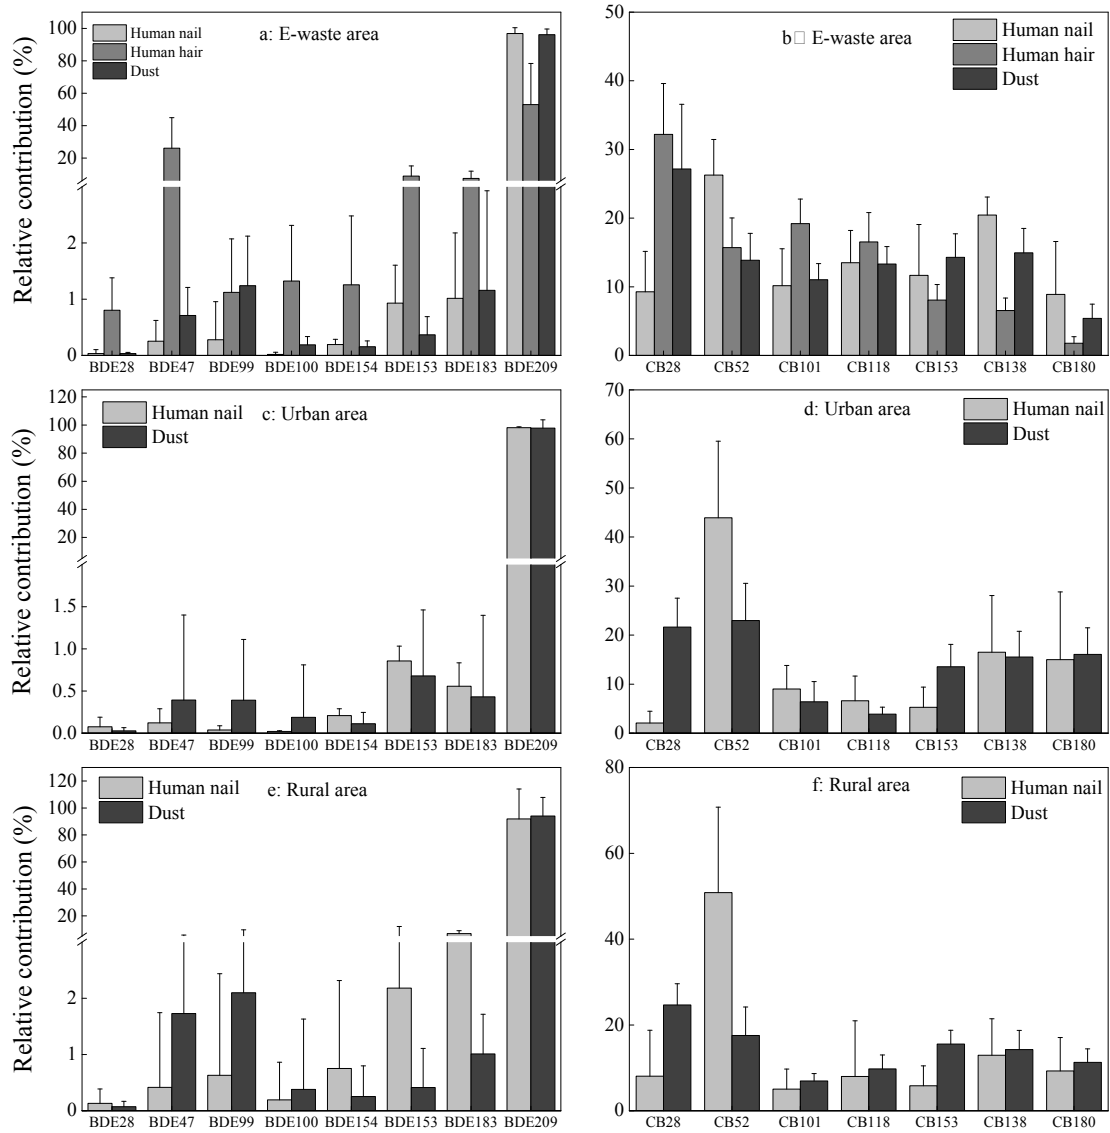

**Fig. S1** PBDE congener profiles in nail samples, hair samples (Zheng et al., 2016) of e-waste dismantling workers, and the corresponding dust samples (He et al., 2017) from South China



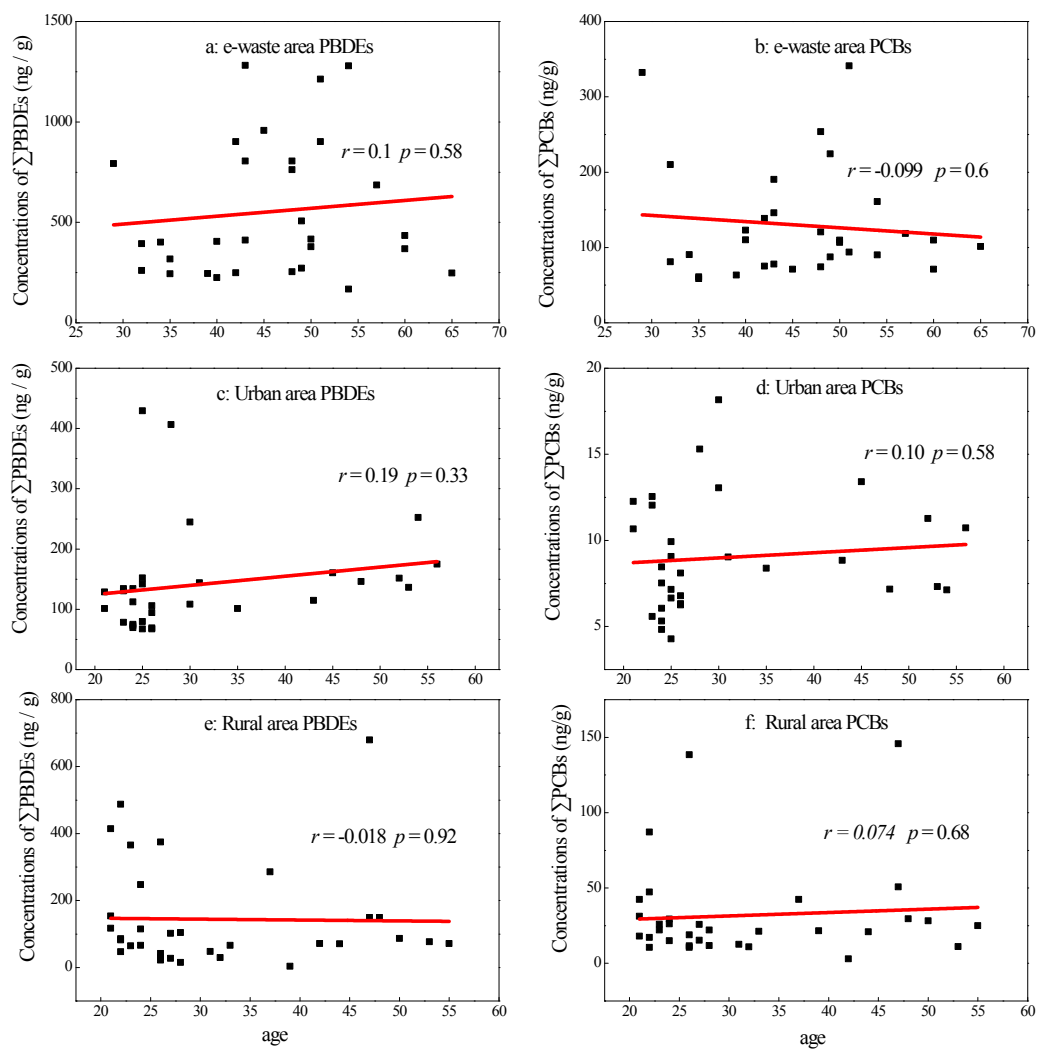

**Fig. S2** Spearman correlation of PBDE and PCB concentrations in nails of e-waste dismantling workers (a, b), and residents from urban (c, d) and rural (e, f) areas from South China
